Complex responses to inflammatory oxidants by the probiotic bacterium *Lactobacillus reuteri*

Poulami Basu Thakur<sup>a</sup>, Abigail R. Long<sup>a</sup>, Benjamin J. Nelson<sup>b</sup>, Ranjit Kumar<sup>c</sup>, Alexander F. Rosenberg<sup>a,d</sup>, and Michael J. Gray<sup>a,#</sup>

Department of Microbiology, School of Medicine, University of Alabama at Birmingham, Birmingham, AL 35294 <sup>a</sup>

Auburn University, Auburn, AL 36849 <sup>b</sup>

Center for Clinical and Translational Sciences, University of Alabama at Birmingham, Birmingham, AL 35294 <sup>c</sup>

Informatics Institute, School of Medicine, University of Alabama at Birmingham, Birmingham, AL 35294 <sup>d</sup>

Running Head: *L. reuteri* response to oxidative stress

<sup>#</sup> Address correspondence to Michael J. Gray, [mjgray@uab.edu](mailto:mjgray@uab.edu)

# ABSTRACT

Inflammatory diseases of the gut are associated with increased intestinal oxygen concentrations and high levels of inflammatory oxidants, including hydrogen peroxide ( $H_2O_2$ ) and hypochlorous acid (HOCl), which are antimicrobial compounds produced by the innate immune system. This contributes to dysbiotic changes in the gut microbiome, including increased populations of pro-inflammatory enterobacteria (*Escherichia coli* and related species) and decreased levels of health-associated anaerobic Firmicutes and Bacteroidetes. The pathways for  $H_2O_2$  and HOCl resistance in *E. coli* have been well-studied, but little is known about how commensal and probiotic bacteria respond to inflammatory oxidants. In this work, we have characterized the transcriptomic response of the anti-inflammatory, gut-colonizing Gram-positive probiotic *Lactobacillus reuteri* to both  $H_2O_2$  and HOCl. *L. reuteri* mounts distinct responses to each of these stressors, and both gene expression and survival were strongly affected by the presence or absence of oxygen. Oxidative stress response in *L. reuteri* required several factors not found in enterobacteria, including the small heat shock protein Lo18, polyphosphate kinase 2, and RsiR, an *L. reuteri*-specific regulator of anti-inflammatory mechanisms. These results raise the intriguing possibility of developing treatments for inflammatory gut diseases that could sensitize pro-inflammatory enterobacteria to killing by the immune system while sparing anti-inflammatory, health-associated species.

# IMPORTANCE

It is becoming increasingly clear that effective treatment of inflammatory gut diseases will require modulation of the gut microbiota. Preventing pro-inflammatory bacteria from

blooming while also preserving anti-inflammatory and commensal species is a considerable challenge, but our results suggest that it may be possible to take advantage of differences in the way different species of gut bacteria resist inflammatory oxidants to accomplish this goal.

## INTRODUCTION

Inflammatory diseases of the gut (*e.g.* inflammatory bowel disease [IBD], Crohn's disease, irritable bowel syndrome [IBS], *etc.*) are a rapidly growing health concern for which few effective treatment options are available (1-3). It has become increasingly clear that the bacterial populations inhabiting the gut play a key role in causing and perpetuating gut inflammation, with an emerging consensus that blooms of facultatively anaerobic enterobacteria (*e.g. Escherichia coli*) take advantage of changes in the nutritional and redox environment of the inflamed gut to outcompete the obligate anaerobes associated with a healthy gut flora (4-8). The redox changes in the inflamed gut include not only increases in oxygen levels (6, 7), but also the production of reactive oxygen, nitrogen, and chlorine species (ROS, RNS, RCS), which are antimicrobial oxidants that can shift the population structure of the microbiome and are major contributors to host tissue damage (9-12). Treatments that interfere with the ability of enterobacteria to thrive in the inflamed gut reduce both the changes in the microbiome and the symptoms of disease (1, 13), indicating that manipulating gut bacteria is an important element in controlling these diseases.

Probiotics are live microorganisms which, when consumed in sufficient quantities, have a measurable health benefit (14), and a variety of different probiotic bacteria have been shown to have anti-inflammatory effects in the gut (15, 16). The most commonly used probiotics are lactic acid bacteria of the genus *Lactobacillus* (17), which are able to both modulate the host immune system and outcompete enterobacterial pathogens (15), and some strains of which have been shown to improve outcomes for inflammatory bowel diseases in both humans and animal models (18-20). The effectiveness of probiotics for treating inflammation in the gut, however, may be limited by their ability to survive attack by the overactive host immune system, including the oxidative damage caused by ROS and RCS. While the general stress response physiology of lactic acid bacteria has been relatively well characterized (21), bacterial responses to oxidative stress are best understood in *E. coli* and related inflammation-enriched enterobacteria (22-25). This is especially true of RCS, including hypochlorous acid (HOCl) and reactive chloramines, which are extremely potent antimicrobial compounds produced by the neutrophil enzyme myeloperoxidase (22, 26-28). Relatively little is known about how health-associated probiotic and commensal bacteria sense and respond to inflammatory oxidants (21, 29-31).

*Lactobacillus reuteri* is a well-established model probiotic bacterium that is able to stably colonize the mammalian intestine (32, 33), where it combats inflammation and enteric infections by several different mechanisms, including anti-inflammatory histamine synthesis (34-37), modulation of immune cell functions (33, 38-40), and production of antimicrobial compounds (e.g. reuterin, reutericyclin)(37, 41, 42). While the genome-

wide stress responses of *L. reuteri* to low pH (43) and bile salts (44, 45) have been characterized, little is known about how this organism responds to ROS, and nothing is known about how *L. reuteri* or any other lactic acid bacterium senses or responds to RCS. The *L. reuteri* genome encodes neither catalase nor superoxide dismutase (49). The oxidative stress repair enzyme methionine sulfoxide reductase (46) is induced by and required for gut colonization by *L. reuteri* (47, 48), indicating that resistance to oxidative damage is important *in vivo*. A cysteine-dependent pathway contributing to H<sub>2</sub>O<sub>2</sub> and O<sub>2</sub> tolerance has been identified (50), but did not appear to play a role in the ability of *L. reuteri* to prevent colitis (51).

In this work, we have now taken a transcriptomic approach to characterize genome-wide H<sub>2</sub>O<sub>2</sub>- and HOCl-dependent gene regulation in *L. reuteri* and to identify genes involved in resistance to killing by these stressors (52), with the goal of finding genes and pathways distinct from those found in the enterobacteria. Our results show that, despite not containing close homologs of any of the known RCS-specific transcription factors (22, 53-56), *L. reuteri* is able to mount clearly different stress responses to H<sub>2</sub>O<sub>2</sub> and HOCl stress, and that the presence of O<sub>2</sub> has dramatic effects on both gene regulation and survival in response to these stresses. We also identified roles for several genes in surviving H<sub>2</sub>O<sub>2</sub>- and HOCl-mediated killing, including those encoding methionine sulfoxide reductase (46), polyphosphate kinase 2 (57, 58), and the lactic acid bacteria-specific small heat shock protein Lo18 (59-61), as well as an unexpected role in surviving H<sub>2</sub>O<sub>2</sub> stress for RsiR, previously characterized as an *L. reuteri*-specific regulator of histamine synthesis (35). Ultimately, we hope these results will help lay the

groundwork for the development of targeted treatments for inflammatory gut diseases that could either preferentially sensitize disease-associated enterobacteria to killing by the immune system or preferentially protect health-promoting probiotic and commensal species, thereby stabilizing the healthy microbiome against inflammatory stress.

# RESULTS AND DISCUSSION

**Growth of *L. reuteri* is inhibited by inflammatory oxidants.** To begin characterizing the response of *L. reuteri* to inflammatory oxidants, we treated anaerobically growing cultures with different concentrations of H<sub>2</sub>O<sub>2</sub> (Fig. 1A) and HOCl (Fig. 1B). *L. reuteri* growth was more sensitive to H<sub>2</sub>O<sub>2</sub> than HOCl, with nearly complete inhibition by 0.96 mM H<sub>2</sub>O<sub>2</sub> or 5 mM HOCl. The sensitivity of *L. reuteri* to H<sub>2</sub>O<sub>2</sub> was very similar to that reported for *L. acidophilus*, another catalase-negative probiotic (31), but, as expected, *L. reuteri* was considerably more sensitive to H<sub>2</sub>O<sub>2</sub> than the pseudocatalase-expressing species *L. plantarum* (62, 63). Since we were interested in characterizing gene regulation during a successful, productive response to sublethal stress, we selected concentrations of 0.12 mM H<sub>2</sub>O<sub>2</sub> and 1.25 mM HOCl for further analysis. These concentrations resulted in very similar slight reductions in growth rate after stress treatment, followed by complete recovery (Fig. 1A and B, red circles). These concentrations of oxidants had no significant effect on cellular NAD<sup>+</sup> / NADH ratios (Fig. 1C, 1D, and S1), indicating that the toxic effects of sublethal H<sub>2</sub>O<sub>2</sub> and HOCl stress did not include major disruptions to the redox state of the bacterial cells.

**Transcriptomic analysis of H<sub>2</sub>O<sub>2</sub> and HOCl response by *L. reuteri*.** We next treated anaerobically growing *L. reuteri* with sublethal doses of H<sub>2</sub>O<sub>2</sub> and HOCl and used RNA sequencing to characterize the transcriptomes of stressed cells before and 5, 15, and 30 minutes after stress treatment (Fig. 2, Table S1). A very large fraction of the *L. reuteri* genome was up- or down-regulated (> 2-fold,  $p < 0.01$ ) by sublethal oxidative stress, and there were clear differences in the responses to H<sub>2</sub>O<sub>2</sub> and HOCl, consistent with previous reports that bacterial responses to these oxidants are different (22-24). As seen in Figure 2, the response to H<sub>2</sub>O<sub>2</sub> involved roughly equal numbers of up- and downregulated genes, with a substantial increase in the number of genes with significant changes in expression over the 30 minute course of stress treatment. In contrast, HOCl treatment caused many more genes to be upregulated than downregulated, and there was not as noticeable an increase in the number of genes with significant changes in gene expression over time, consistent with the very fast reaction rate of HOCl with biological molecules (22, 27, 64). The difference between the H<sub>2</sub>O<sub>2</sub> and HOCl stress responses were also reflected in principal components analysis of the transcriptomic data (Fig. S2A), which clearly separated the H<sub>2</sub>O<sub>2</sub> and HOCl treated samples. The untreated samples from the two experiments did not cluster as closely together as we expected, since these samples were ostensibly identical. To determine whether this reflected batch effects or inherent variation in expression levels for particular genes, we selected representative genes that had similar (*sigH*, *moeB*, *pcl1*) or different (*pstS*, *copR*) levels of expression in the untreated samples from the two RNA-seq data sets (Table S1) and used RT-PCR to measure their expression in

independently prepared unstressed *L. reuteri* cultures, and found that the amount of variation in expression was similar for all five genes (Fig. S2B).

To further characterize the differences and overlaps between the H<sub>2</sub>O<sub>2</sub> and HOCl stress responses of *L. reuteri*, we plotted changes in gene expression under each tested condition against each other condition (Fig. 3, Table S2). This showed that, while many of the genes significantly upregulated by H<sub>2</sub>O<sub>2</sub> were also upregulated by HOCl, there were substantial numbers of genes that were upregulated by one stress treatment and downregulated by the other and *vice versa*, indicating that *L. reuteri* has a sophisticated ability to distinguish between H<sub>2</sub>O<sub>2</sub> and HOCl and differentially control transcription. Clustering analysis of genome-wide expression patterns (Fig. 4) reinforced this result, and we were able to identify groups of genes whose expression was controlled in very similar ways by the different oxidants (*e.g.* Fig. 4B and G) as well as groups of genes with very different expression patterns in response to H<sub>2</sub>O<sub>2</sub> and HOCl (*e.g.* Fig. 4C, D, and H), including, for example, *cgl* and *cyuABC*, which encode a previously characterized cysteine-dependent redox stress response pathway (50). This is consistent with results in *E. coli* and *Bacillus subtilis*, in which H<sub>2</sub>O<sub>2</sub> and HOCl stress responses partially overlap, but have substantial oxidant-specific components (22, 27, 56, 64, 65).

*L. reuteri*'s response to H<sub>2</sub>O<sub>2</sub> was generally consistent with what has been previously observed in other catalase-negative Gram-positive bacteria (21, 23, 24, 31, 66-68). Highly upregulated genes included alkylhydroperoxidase (*ahpCF*)(69), NADH oxidase



(*noxE*)(70), methionine sulfoxide reductase (*msrB*)(46), DNA repair genes (*uvrABD*, *xthA*, *umuC*)(71), predicted metal transporters (*pcl1*, *pcl2*), and the peroxide-sensing transcription factor PerR (68). The response to HOCl was also, in broad strokes, similar to that of previously characterized bacteria (22), in that upregulated genes included those involved in proteostasis (*groSL*, *clpE*, *hsp20/lo18*), metal stress (*pcl1*, *pcl2*, *copAR*), thioredoxins (*trxABD*), and cysteine and methionine synthesis (*cysK*, *metE*). Genes upregulated by both stressors included not only *msrB*, *ahpCF*, *perR*, and the predicted iron transporters encoded by *pcl1* and *pcl2*, but a variety of predicted sugar and amino acid transporters and metabolic enzymes (*oxc*, encoding oxalyl-CoA decarboxylase (72), for example). These may represent responses to changes in the nutritional environment *L. reuteri* encounters in the inflamed gut (6, 8).

**Redox-regulated transcription factors in *L. reuteri*.** While many bacterial transcription factors have been described that respond to H<sub>2</sub>O<sub>2</sub> and / or HOCl, *L. reuteri* encodes only a few homologs of known H<sub>2</sub>O<sub>2</sub>-detecting transcription factors (e.g. PerR and VicK (24, 67)) and no close homologs of any of the known HOCl-detecting transcription factors (22, 53-55, 68, 73). This suggested that among the 104 predicted transcription factors encoded by the *L. reuteri* genome (Table S3), there are likely to be novel redox-sensing regulators. To begin to assess this possibility, we performed clustering analysis on the expression of genes encoding transcription factors under both stress conditions (Fig. 5), reasoning that many bacterial transcription factors are autoregulated, and that changes in expression of transcription factors are useful signposts for identifying regulatory stress-response networks (53, 65, 74). We found

genes encoding predicted transcription factors whose expression was activated by both H<sub>2</sub>O<sub>2</sub> and HOCl (e.g. *perR*, *spxA*, LAR\_RS09770), repressed by both H<sub>2</sub>O<sub>2</sub> and HOCl (e.g. *kdgR*, *fabT*), activated only by H<sub>2</sub>O<sub>2</sub> (e.g. *lexA*, LAR\_RS07525), activated only by HOCl (e.g. *ctsR*, *copR*), repressed only by H<sub>2</sub>O<sub>2</sub> (e.g. *sigH*, *rex*), and repressed only by HOCl (e.g. *malR3*, LAR\_RS02755), indicating the presence of a complex regulatory response to both oxidants. Some of these regulators have known functions, which give useful insights into the *in vivo* effects of H<sub>2</sub>O<sub>2</sub> and HOCl on *L. reuteri*. For example, only HOCl activated expression of *ctsR*, a conserved regulator of protein quality control in Gram positive bacteria (75, 76), consistent with the known ability of HOCl to unfold and aggregate proteins (77, 78) and the activation of the heat shock response in many species of HOCl-stressed bacteria (22). On the other hand, only H<sub>2</sub>O<sub>2</sub> activated expression of the DNA-damage responsive *lexA* regulator (71), consistent with the known ability of H<sub>2</sub>O<sub>2</sub> to damage DNA (23), and suggesting that HOCl does not cause DNA damage at the concentration used in this experiment. However, most of the transcription factors in *L. reuteri* have no known function, and the expression patterns of many of these genes were affected by the redox stress treatments. For example, the only alternative sigma factor (79) encoded in the *L. reuteri* genome (*sigH*) was downregulated strongly by H<sub>2</sub>O<sub>2</sub>, but unaffected by HOCl. We do not currently know what genes these uncharacterized regulators regulate, what role(s) they may play in surviving redox stress, or what transcription factor(s) are responsible for HOCl-specific regulation in *L. reuteri*.

**Oxygen affects H<sub>2</sub>O<sub>2</sub>- and HOCl-dependent gene expression in *L. reuteri*.** We used quantitative RT-PCR to measure the changes in expression of selected genes in anaerobically grown *L. reuteri* treated with different concentrations of H<sub>2</sub>O<sub>2</sub> and HOCl, at, above, and below the sublethal concentrations used in previous experiments (Fig. 6, left hand columns). We examined two genes strongly activated by both H<sub>2</sub>O<sub>2</sub> and HOCl (*ahpF* and *pcl1*) and a gene repressed by both oxidants (*moeB*, encoding a subunit of molybdopterin synthase (80)) (Table S1) and confirmed the expected expression patterns. Interestingly, the genes differed in their dose-response patterns, with *moeB* roughly equally repressed at all H<sub>2</sub>O<sub>2</sub> and HOCl concentrations, *ahpF* equally activated by all three H<sub>2</sub>O<sub>2</sub> concentrations but activated more strongly by increasing doses of HOCl, and *pcl1* activated more strongly at lower doses of H<sub>2</sub>O<sub>2</sub> and at higher doses of HOCl. RT-PCR of the *perR* and *sigH* regulator genes also recapitulated the expression patterns seen in RNA-seq (Fig. 5), although at higher HOCl concentrations (2.5 mM), *sigH* expression began to be repressed, indicating that its control is not strictly H<sub>2</sub>O<sub>2</sub>-specific. Finally, we examined expression of *rsiR*, a known regulator of anti-inflammatory mechanisms in *L. reuteri* (34, 35) that was modestly upregulated by both H<sub>2</sub>O<sub>2</sub> and HOCl in the RNA-seq experiment (Fig. S4), but we did not observe activation of *rsiR* expression in this follow-up experiment, indicating that expression of *rsiR* may not genuinely be redox-regulated under anaerobic conditions.

While the intestine is primarily an anaerobic environment (5), recent evidence suggests that inflammation, antibiotic treatment, and infection with enteric pathogens may increase the amount of oxygen available to microbes in the gut (6, 7). We therefore

wanted to assess how much of an effect oxygen has on expression of redox regulated genes in *L. reuteri*. We repeated our RT-PCR experiment with microaerobic cultures, which were prepared aerobically and grown in full screw-cap tubes without shaking, low-oxygen conditions under which *L. reuteri* grows at a similar rate as under anaerobic conditions (data not shown). The results of this experiment (Fig. 6, right hand columns) revealed that the presence of even the low levels of oxygen expected in these cultures had large effects on redox-responsive gene expression. In contrast to what we observed anaerobically, expression of *ahpF*, *pcl1*, *moeB*, and *sigH* was unaffected by H<sub>2</sub>O<sub>2</sub> under these conditions, and activation of *perR* was substantially reduced. HOCl activation of *ahpF*, *pcl1*, and *perR* expression was eliminated in the presence of oxygen, and both *moeB* and *rsiR* expression were HOCl-repressed. These results showed that oxygen can dramatically affect how bacteria regulate gene expression in response to inflammatory oxidants, and that studies of redox responses under aerobic growth conditions may not reflect how bacteria respond in anaerobic environments and *vice versa*.

**Identifying genes important for surviving oxidative stress in *L. reuteri*.** Finally, we wanted to use the gene expression data generated above to begin identifying genes involved in protecting *L. reuteri* against the toxicity of H<sub>2</sub>O<sub>2</sub> and HOCl, based on the simple hypothesis that genes strongly upregulated by a certain stress may be involved in protecting the cell against that stress (81). We were particularly interested in identifying genes encoding factors that protect *L. reuteri* against HOCl, since much less is known about HOCl defense in bacteria in general (22), and no previous studies have

examined how lactic acid bacteria survive reactive chlorine stress. We therefore identified lethal doses of H<sub>2</sub>O<sub>2</sub> and HOCl for *L. reuteri* (Fig. S3), and found that 1.5 mM H<sub>2</sub>O<sub>2</sub> was sufficient to kill 99 – 99.9% of *L. reuteri* over the course of an hour both anaerobically and microaerobically. Anaerobic cultures of *L. reuteri* were killed by 7.5 mM HOCl, while microaerobic cultures died to a similar extent at only 2.5 mM HOCl, further demonstrating that oxygen influences how *L. reuteri* responds to toxic oxidants.

We constructed several strains containing null mutations of genes that we predicted to be involved in defense against either H<sub>2</sub>O<sub>2</sub> or HOCl, based on known bacterial redox stress response mechanisms (22, 23, 53, 82) and on our transcriptomic data (Fig. S4, Table S4). We obtained mutants lacking *msrB*, *perR*, *sigH*, *rsiR*, *lo18* (*hsp20*), which encodes a small heat shock protein found only in lactic acid bacteria (59, 60) and whose expression was more strongly activated by HOCl than by H<sub>2</sub>O<sub>2</sub>, *ppk1* and *ppk2*, encoding two different kinases able to produce inorganic polyphosphate (polyP), which protects against HOCl-mediated protein damage in *E. coli* (57, 77, 83), *rclA*, encoding a conserved flavoprotein known to protect *E. coli* against HOCl (53), *hslO*, encoding the HOCl-activated chaperone Hsp33 (78), and LAR\_RS09945, encoding a predicted oxidoreductase that was very strongly upregulated by HOCl, but not by H<sub>2</sub>O<sub>2</sub>. The ability of each of these strains to survive lethal oxidative stress was measured by comparison to the survival of the wild-type strain under the same conditions (Fig. 7).

Anaerobically, the *msrB* mutant was extremely sensitive to lethal H<sub>2</sub>O<sub>2</sub> treatment, as expected (23, 46), and the *perR* mutant, which is expected to have constitutively high

expression of peroxide defense genes (84), was significantly protected. A mutant lacking *rsiR* was significantly more sensitive to killing by H<sub>2</sub>O<sub>2</sub>, suggesting that despite the fact that its expression may not be controlled by this oxidant (Fig. 6), it is important for surviving H<sub>2</sub>O<sub>2</sub> treatment (35). Surprisingly, only the *perR* mutant was significantly more sensitive than wild-type to killing by HOCl under anaerobic conditions. However, knocking out *lo18* had a significant and unexpected protective effect. This was particularly surprising since *lo18* expression was strongly upregulated in response to HOCl (Table S4). Under microaerobic conditions, the results of survival assays were considerably different. There were only minor differences in survival of a lethal dose of H<sub>2</sub>O<sub>2</sub> in microaerobic cultures for any of the mutants, with *msrB*, *rsiR*, and *rclA* mutants showing very small but statistically significant defects in survival at the 1-hour time point. In contrast, there were much more substantial differences in survival of lethal HOCl stress under microaerobic conditions. The *msrB*, *perR*, *lo18* and *ppk2* mutants had significant defects in HOCl stress survival under these conditions, and the *rsiR*, *ppk1*, and *rclA* mutants were, on average, slightly more sensitive than the wild-type. The *perR* and LAR\_RS09945 mutants were significantly protected at the 20 minute timepoint, but this effect was lost at later time points. There was no difference in HOCl survival between the wild-type and *sigH* or *hsIO* mutants. These results further emphasize that oxygen concentration has dramatic effects on oxidative stress survival, and that it will therefore be important to quantify what oxygen levels gut bacteria are exposed to in inflamed and non-inflamed gut environments (5-7) to understand what genes are likely to play roles in ROS and RCS resistance *in vivo*.

Screening mutants lacking HOCl-induced genes has successfully identified HOCl resistance factors in other bacterial species (53, 54, 56, 65), but this strategy had limited success in *L. reuteri*. Neither *sigH* nor LAR\_RS09945 mutations, for example, had any effect on survival of the stresses which regulate their expression. In future work, a genome-wide mutant screening approach (e.g. transposon sequencing)(52) may be valuable for identifying additional genes required for H<sub>2</sub>O<sub>2</sub> and HOCl stress survival. Nevertheless, our targeted mutagenesis approach did allow us to identify several important players in oxidative stress resistance. Clearly, methionine sulfoxide reductase is a major contributor to the ability of *L. reuteri* to survive oxidative stress both anaerobically and microaerobically, consistent with its enzymatic activity (46) and known role in colonization (47, 48). While PerR is relatively unimportant microaerobically, anaerobically it plays an key role in regulating H<sub>2</sub>O<sub>2</sub> resistance, as expected (68), although for unknown reasons it appears that the constitutive overexpression of H<sub>2</sub>O<sub>2</sub>-resistance genes expected in a *perR* mutant is detrimental in the presence of HOCl.

***L. reuteri*-specific defenses against H<sub>2</sub>O<sub>2</sub> and HOCl stress.** The H<sub>2</sub>O<sub>2</sub>-sensitivity of the *rsiR* mutant was somewhat surprising, since this *L. reuteri*-specific gene has largely been characterized for its role in regulating the expression of the histamine-producing histidine decarboxylase locus of *L. reuteri*, where *rsiR* is essential for histamine-dependent anti-inflammatory phenotypes (34, 35). However, RsiR is a global regulator, activating and repressing transcription of 195 and 143 genes, respectively, many of which are involved in redox homeostasis (including *ahpC*, *perR*, and genes involved in

cysteine and methionine synthesis)(35). It is currently unclear what signal(s) RsiR responds to, which RsiR-regulated genes contribute to H<sub>2</sub>O<sub>2</sub> sensitivity, or what role H<sub>2</sub>O<sub>2</sub> resistance plays in RsiR-dependent anti-inflammatory effects *in vivo*, and these are exciting questions for future research exploring the connections between inflammatory oxidants and anti-inflammatory probiotic mechanisms.

The small heat shock protein Hsp33 and the flavoprotein RclA are RCS-specific defense factors in *E. coli* (53, 78), so we were also surprised to find that mutations of these genes had no apparent effect on HOCl survival in *L. reuteri*, despite the fact that *rclA* expression was induced more strongly by HOCl treatment than by H<sub>2</sub>O<sub>2</sub> (Table S4). This could be due to the redundant nature of RCS resistance mechanisms (22), or could reflect fundamental differences in RCS response between *L. reuteri* and *E. coli*. Supporting the second hypothesis is the fact that mutations in *lo18* and *ppk2*, genes not found in *E. coli*, had very strong effects on HOCl survival. Lo18 is a chaperone found only in a subset of *Lactobacillus* and *Oenococcus* species that stabilizes proteins and membranes under heat and ethanol stress conditions (59, 60). While this could easily explain how Lo18 protects *L. reuteri* against the protein-unfolding activity of HOCl, as we saw under microaerobic conditions, it is much less intuitive why the presence of Lo18 sensitizes *L. reuteri* to HOCl anaerobically, and more work will be needed to understand the mechanism underlying this effect. PolyP plays a role in stress resistance and probiotic phenotypes in several different *Lactobacillus* species (85-90). In *E. coli*, the polyP kinase PPK (homologous to *L. reuteri* PPK1) is required for HOCl resistance (77), but deletion of *ppk1* had only a modest, non-statistically significant effect on HOCl



resistance in *L. reuteri*. In contrast, deletion of *ppk2*, which encodes an unrelated polyP kinase (PPK2) whose primary physiological role is generally thought to be in generating NTPs from NDPs or NMPs and polyP (57, 58), led to a highly significant defect in HOCl survival, albeit only in the presence of oxygen. Whether polyP production in response to HOCl stress is driven by PPK1 or PPK2 in *L. reuteri* remains to be determined, as does the relative importance of PPK2's polyP- and NTP-synthesizing activities. PPK2 is not present in enterobacteria, but is found in many species of commensal bacteria (including lactobacilli, Bacteroidetes, and Clostridiaceae)(58, 91, 92)

Our results clearly demonstrate that HOCl resistance in *L. reuteri* depends on different factors than in *E. coli* or *B. subtilis*. These differences may represent targets for differentially sensitizing gut bacteria to oxidative stress. Interestingly, the frontline IBD drug mesalamine has recently been shown to be an inhibitor of PPK1 (93), and it is tempting to speculate that mesalamine may therefore have a larger impact on the ability of enterobacteria to survive in the inflamed gut than on PPK2-encoding commensals, although more data will be needed to test this hypothesis.

## CONCLUSIONS

Manipulating the microbiome is likely to be a key element in future treatments for inflammatory diseases of the gut. Development of such treatments will require a sophisticated understanding of how gut bacteria respond to changes in their environment. The differences we have now begun to uncover in oxidative stress response between anti-inflammatory, health-associated bacteria and pro-inflammatory,

disease-associated species may present opportunities for new therapies. We hope our results will ultimately make it possible to sensitize enterobacteria to inflammatory oxidants while simultaneously protecting the healthy gut community.

## **MATERIALS AND METHODS**

### **Bacterial strains and growth conditions**

All strains and plasmids used in this study are listed in Table 1. All *L. reuteri* strains were derivatives of strain ATCC PTA 6475 (Biogaia)(94). Strain 6475*rsiR*-Stop (35) was a gift from James Versalovic (Baylor College of Medicine), and plasmid pJP042 (*recT*<sup>+</sup> *erm*<sup>+</sup>)(94) was a gift from Jan-Peter van Pijkeren (University of Wisconsin – Madison). *L. reuteri* was grown at 37°C in MEI broth (86) without added cysteine (MEI-C) or on solid De Man, Rogosa, and Sharpe (MRS) agar (Difco). Anaerobic cultures were incubated in an anaerobic chamber (Coy Laboratory Products) in an atmosphere of 90% nitrogen, 5% CO<sub>2</sub>, and 5% H<sub>2</sub> or in Hungate tubes prepared, inoculated, and sealed in that chamber. Liquid media were made anaerobic before use by equilibration for at least 24 hours in the anaerobic chamber. MRS plates for colony forming unit (CFU) plate counts were incubated in sealed containers made anaerobic using GasPak™ EZ sachets (Becton Dickinson). Microaerobic cultures were incubated aerobically without shaking in 16 x 125 mm screw-cap test tubes containing 15 ml of MEI-C. Details of H<sub>2</sub>O<sub>2</sub> and HOCl stress treatments, transcript quantification, and phenotype analysis are described in the Supplemental Material.

### **Molecular methods**

Oligo-directed recombineering was used to construct null mutations in the chromosome of *L. reuteri* using the pJP042-encoded RecT recombinase as previously described (94). Null mutations were designed to incorporate in-frame stop codons near the 5' end of each gene. Mutagenic primers used are listed in Table S5. Primers used for quantitative RT-PCR were designed with Primer Quest ([www.idtdna.com](http://www.idtdna.com); parameter set "qPCR 2 primers intercalating dyes" for qRT-PCR primer design) and are listed in Table S6. Additional primers for PCR amplification, screening, and sequencing were designed using WebPrimer ([www.candidagenome.org/cgi-bin/compute/web-primer](http://www.candidagenome.org/cgi-bin/compute/web-primer)). All chromosomal mutations were confirmed by Sanger sequencing (UAB Heflin Center for Genomic Sciences).

**Data availability.** All strains generated in the course of this work are available from the authors upon request. RNA sequencing data have been deposited in NCBI's Gene Expression Omnibus (95) and are accessible through GEO Series accession number GSE127961 (<https://www.ncbi.nlm.nih.gov/geo/query/acc.cgi?acc=GSE127961>).

## ACKNOWLEDGEMENTS

We thank Drs. Rob Britton and James Versalovic (Baylor College of Medicine) and Dr. J.P. van Pijkeren (University of Wisconsin – Madison) for strains and plasmids. This project was supported by University of Alabama at Birmingham Department of Microbiology startup funds and NIH grant R35GM124590 (to M.J.G). The authors have no conflicts of interest to declare.

# REFERENCES

1. Knox NC, Forbes JD, Van Domselaar G, Bernstein CN. 2019. The Gut Microbiome as a Target for IBD Treatment: Are We There Yet? *Curr Treat Options Gastroenterol* doi:10.1007/s11938-019-00221-w.
2. Ng SC, Shi HY, Hamidi N, Underwood FE, Tang W, Benchimol EI, Panaccione R, Ghosh S, Wu JCY, Chan FKL, Sung JJY, Kaplan GG. 2018. Worldwide incidence and prevalence of inflammatory bowel disease in the 21st century: a systematic review of population-based studies. *Lancet* 390:2769-2778.
3. Pillai N, Dusheiko M, Burnand B, Pittet V. 2017. A systematic review of cost-effectiveness studies comparing conventional, biological and surgical interventions for inflammatory bowel disease. *PLoS One* 12:e0185500.
4. Major G, Spiller R. 2014. Irritable bowel syndrome, inflammatory bowel disease and the microbiome. *Curr Opin Endocrinol Diabetes Obes* 21:15-21.
5. Friedman ES, Bittinger K, Esipova TV, Hou L, Chau L, Jiang J, Mesaros C, Lund PJ, Liang X, FitzGerald GA, Goulian M, Lee D, Garcia BA, Blair IA, Vinogradov SA, Wu GD. 2018. Microbes vs. chemistry in the origin of the anaerobic gut lumen. *Proc Natl Acad Sci U S A* 115:4170-4175.
6. Byndloss MX, Baumler AJ. 2018. The germ-organ theory of non-communicable diseases. *Nat Rev Microbiol* 16:103-110.
7. Rivera-Chavez F, Lopez CA, Baumler AJ. 2017. Oxygen as a driver of gut dysbiosis. *Free Radic Biol Med* 105:93-101.
8. Stecher B. 2015. The Roles of Inflammation, Nutrient Availability and the Commensal Microbiota in Enteric Pathogen Infection. *Microbiol Spectr* 3.

- 451 9. Bhattacharyya A, Chattopadhyay R, Mitra S, Crowe SE. 2014. Oxidative stress:  
452 an essential factor in the pathogenesis of gastrointestinal mucosal diseases.  
453 *Physiol Rev* 94:329-54.
- 454 10. Hansberry DR, Shah K, Agarwal P, Agarwal N. 2017. Fecal Myeloperoxidase as  
455 a Biomarker for Inflammatory Bowel Disease. *Cureus* 9:e1004.
- 456 11. Chami B, Martin NJJ, Dennis JM, Witting PK. 2018. Myeloperoxidase in the  
457 inflamed colon: A novel target for treating inflammatory bowel disease. *Arch*  
458 *Biochem Biophys* 645:61-71.
- 459 12. Kruidenier L, Kuiper I, Lamers CB, Verspaget HW. 2003. Intestinal oxidative  
460 damage in inflammatory bowel disease: semi-quantification, localization, and  
461 association with mucosal antioxidants. *J Pathol* 201:28-36.
- 462 13. Zhu W, Winter MG, Byndloss MX, Spiga L, Duerkop BA, Hughes ER, Buttner L,  
463 de Lima Romao E, Behrendt CL, Lopez CA, Sifuentes-Dominguez L, Huff-Hardy  
464 K, Wilson RP, Gillis CC, Tukul C, Koh AY, Burstein E, Hooper LV, Baumler AJ,  
465 Winter SE. 2018. Precision editing of the gut microbiota ameliorates colitis.  
466 *Nature* 553:208-211.
- 467 14. Morelli L, Capurso L. 2012. FAO/WHO guidelines on probiotics: 10 years later. *J*  
468 *Clin Gastroenterol* 46 Suppl:S1-2.
- 469 15. Engevik MA, Versalovic J. 2017. Biochemical Features of Beneficial Microbes:  
470 Foundations for Therapeutic Microbiology. *Microbiol Spectr* 5.
- 471 16. Lee IC, Tomita S, Kleerebezem M, Bron PA. 2013. The quest for probiotic  
472 effector molecules--unraveling strain specificity at the molecular level. *Pharmacol*  
473 *Res* 69:61-74.

17. Duar RM, Lin XB, Zheng J, Martino ME, Grenier T, Perez-Munoz ME, Leulier F, Ganzle M, Walter J. 2017. Lifestyles in transition: evolution and natural history of the genus *Lactobacillus*. *FEMS Microbiol Rev* 41:S27-S48.
18. Tomusiak-Plebanek A, Heczko P, Skowron B, Baranowska A, Okon K, Thor PJ, Strus M. 2018. *Lactobacilli* with superoxide dismutase-like or catalase activity are more effective in alleviating inflammation in an inflammatory bowel disease mouse model. *Drug Des Devel Ther* 12:3221-3233.
19. Abraham BP, Quigley EMM. 2017. Probiotics in Inflammatory Bowel Disease. *Gastroenterol Clin North Am* 46:769-782.
20. Ganji-Arjenaki M, Rafieian-Kopaei M. 2018. Probiotics are a good choice in remission of inflammatory bowel diseases: A meta analysis and systematic review. *J Cell Physiol* 233:2091-2103.
21. Papadimitriou K, Alegria A, Bron PA, de Angelis M, Gobbetti M, Kleerebezem M, Lemos JA, Linares DM, Ross P, Stanton C, Turrone F, van Sinderen D, Varmanen P, Ventura M, Zuniga M, Tsakalidou E, Kok J. 2016. Stress Physiology of Lactic Acid Bacteria. *Microbiol Mol Biol Rev* 80:837-90.
22. Gray MJ, Wholey WY, Jakob U. 2013. Bacterial responses to reactive chlorine species. *Annu Rev Microbiol* 67:141-60.
23. Imlay JA. 2013. The molecular mechanisms and physiological consequences of oxidative stress: lessons from a model bacterium. *Nat Rev Microbiol* 11:443-54.
24. Imlay JA. 2015. Transcription Factors That Defend Bacteria Against Reactive Oxygen Species. *Annu Rev Microbiol* 69:93-108.

- 496 25. Goemans CV, Vertommen D, Agrebi R, Collet JF. 2018. CnoX Is a  
497 Chaperedoxin: A Holdase that Protects Its Substrates from Irreversible Oxidation.  
498 Mol Cell 70:614-627 e7.
- 499 26. Green JN, Chapman ALP, Bishop CJ, Winterbourn CC, Kettle AJ. 2017.  
500 Neutrophil granule proteins generate bactericidal ammonia chloramine on  
501 reaction with hydrogen peroxide. Free Radic Biol Med 113:363-371.
- 502 27. Winterbourn CC, Kettle AJ, Hampton MB. 2016. Reactive Oxygen Species and  
503 Neutrophil Function. Annu Rev Biochem 85:765-92.
- 504 28. Klebanoff SJ. 2005. Myeloperoxidase: friend and foe. J Leukoc Biol 77:598-625.
- 505 29. Mishra S, Imlay JA. 2013. An anaerobic bacterium, *Bacteroides*  
506 *thetaiotaomicron*, uses a consortium of enzymes to scavenge hydrogen peroxide.  
507 Mol Microbiol 90:1356-71.
- 508 30. Oberg TS, Ward RE, Steele JL, Broadbent JR. 2015. Transcriptome analysis of  
509 *Bifidobacterium longum* strains that show a differential response to hydrogen  
510 peroxide stress. J Biotechnol 212:58-64.
- 511 31. Calderini E, Celebioglu HU, Villarroel J, Jacobsen S, Svensson B, Pessione E.  
512 2017. Comparative proteomics of oxidative stress response of *Lactobacillus*  
513 *acidophilus* NCFM reveals effects on DNA repair and cysteine de novo synthesis.  
514 Proteomics 17.
- 515 32. Walter J, Britton RA, Roos S. 2011. Host-microbial symbiosis in the vertebrate  
516 gastrointestinal tract and the *Lactobacillus reuteri* paradigm. Proc Natl Acad Sci  
517 U S A 108 Suppl 1:4645-52.

33. Mu Q, Tavella VJ, Luo XM. 2018. Role of *Lactobacillus reuteri* in Human Health and Diseases. *Front Microbiol* 9:757.
34. Gao C, Major A, Rendon D, Lugo M, Jackson V, Shi Z, Mori-Akiyama Y, Versalovic J. 2015. Histamine H2 Receptor-Mediated Suppression of Intestinal Inflammation by Probiotic *Lactobacillus reuteri*. *MBio* 6:e01358-15.
35. Hemarajata P, Gao C, Pflughoeft KJ, Thomas CM, Saulnier DM, Spinler JK, Versalovic J. 2013. *Lactobacillus reuteri*-specific immunoregulatory gene *rsiR* modulates histamine production and immunomodulation by *Lactobacillus reuteri*. *J Bacteriol* 195:5567-76.
36. Thomas CM, Hong T, van Pijkeren JP, Hemarajata P, Trinh DV, Hu W, Britton RA, Kalkum M, Versalovic J. 2012. Histamine derived from probiotic *Lactobacillus reuteri* suppresses TNF via modulation of PKA and ERK signaling. *PLoS One* 7:e31951.
37. Jones SE, Versalovic J. 2009. Probiotic *Lactobacillus reuteri* biofilms produce antimicrobial and anti-inflammatory factors. *BMC Microbiol* 9:35.
38. Roth D, Chiang AJ, Hu W, Gugiu GB, Morra CN, Versalovic J, Kalkum M. 2018. Two-carbon folate cycle of commensal *Lactobacillus reuteri* 6475 gives rise to immunomodulatory ethionine, a source for histone ethylation. *FASEB J* doi:10.1096/fj.201801848R:fj201801848R.
39. Santos F, Spinler JK, Saulnier DM, Molenaar D, Teusink B, de Vos WM, Versalovic J, Hugenholtz J. 2011. Functional identification in *Lactobacillus reuteri* of a PocR-like transcription factor regulating glycerol utilization and vitamin B12 synthesis. *Microb Cell Fact* 10:55.



40. Cervantes-Barragan L, Chai JN, Tianero MD, Di Luccia B, Ahern PP, Merriman J, Cortez VS, Caparon MG, Donia MS, Gilfillan S, Cella M, Gordon JI, Hsieh CS, Colonna M. 2017. *Lactobacillus reuteri* induces gut intraepithelial CD4(+)CD8alpha(+) T cells. *Science* 357:806-810.
41. Ganzle MG. 2004. Reutericyclin: biological activity, mode of action, and potential applications. *Appl Microbiol Biotechnol* 64:326-32.
42. Spinler JK, Taweechoatipatr M, Rognerud CL, Ou CN, Tumwasorn S, Versalovic J. 2008. Human-derived probiotic *Lactobacillus reuteri* demonstrate antimicrobial activities targeting diverse enteric bacterial pathogens. *Anaerobe* 14:166-71.
43. Lee K, Lee HG, Pi K, Choi YJ. 2008. The effect of low pH on protein expression by the probiotic bacterium *Lactobacillus reuteri*. *Proteomics* 8:1624-30.
44. Whitehead K, Versalovic J, Roos S, Britton RA. 2008. Genomic and genetic characterization of the bile stress response of probiotic *Lactobacillus reuteri* ATCC 55730. *Appl Environ Microbiol* 74:1812-9.
45. Lee K, Lee HG, Choi YJ. 2008. Proteomic analysis of the effect of bile salts on the intestinal and probiotic bacterium *Lactobacillus reuteri*. *J Biotechnol* 137:14-9.
46. Ezraty B, Aussel L, Barras F. 2005. Methionine sulfoxide reductases in prokaryotes. *Biochim Biophys Acta* 1703:221-9.
47. Walter J, Chagnaud P, Tannock GW, Loach DM, Dal Bello F, Jenkinson HF, Hammes WP, Hertel C. 2005. A high-molecular-mass surface protein (Lsp) and methionine sulfoxide reductase B (MsrB) contribute to the ecological performance of *Lactobacillus reuteri* in the murine gut. *Appl Environ Microbiol* 71:979-86.

48. Walter J, Heng NC, Hammes WP, Loach DM, Tannock GW, Hertel C. 2003. Identification of *Lactobacillus reuteri* genes specifically induced in the mouse gastrointestinal tract. *Appl Environ Microbiol* 69:2044-51.
49. Saulnier DM, Santos F, Roos S, Mistretta TA, Spinler JK, Molenaar D, Teusink B, Versalovic J. 2011. Exploring metabolic pathway reconstruction and genome-wide expression profiling in *Lactobacillus reuteri* to define functional probiotic features. *PLoS One* 6:e18783.
50. Lo R, Turner MS, Barry DG, Sreekumar R, Walsh TP, Giffard PM. 2009. Cystathionine gamma-lyase is a component of cystine-mediated oxidative defense in *Lactobacillus reuteri* BR11. *J Bacteriol* 191:1827-37.
51. Atkins HL, Geier MS, Prisciandaro LD, Pattanaik AK, Forder RE, Turner MS, Howarth GS. 2012. Effects of a *Lactobacillus reuteri* BR11 mutant deficient in the cystine-transport system in a rat model of inflammatory bowel disease. *Dig Dis Sci* 57:713-9.
52. Perez-Sepulveda BM, Hinton JCD. 2018. Functional Transcriptomics for Bacterial Gene Detectives. *Microbiol Spectr* 6.
53. Parker BW, Schwessinger EA, Jakob U, Gray MJ. 2013. The RclR protein is a reactive chlorine-specific transcription factor in *Escherichia coli*. *J Biol Chem* 288:32574-84.
54. Loi VV, Busche T, Tedin K, Bernhardt J, Wollenhaupt J, Huyen NTT, Weise C, Kalinowski J, Wahl MC, Fulde M, Antelmann H. 2018. Redox-Sensing Under Hypochlorite Stress and Infection Conditions by the Rrf2-Family Repressor HypR in *Staphylococcus aureus*. *Antioxid Redox Signal* 29:615-636.

55. Gennaris A, Ezraty B, Henry C, Agrebi R, Vergnes A, Oheix E, Bos J, Leverrier P, Espinosa L, Szewczyk J, Vertommen D, Iranzo O, Collet JF, Barras F. 2015. Repairing oxidized proteins in the bacterial envelope using respiratory chain electrons. *Nature* 528:409-412.
56. Chi BK, Gronau K, Mader U, Hessling B, Becher D, Antelmann H. 2011. S-bacillithiolation protects against hypochlorite stress in *Bacillus subtilis* as revealed by transcriptomics and redox proteomics. *Mol Cell Proteomics* 10:M111009506.
57. Motomura K, Hirota R, Okada M, Ikeda T, Ishida T, Kuroda A. 2014. A new subfamily of polyphosphate kinase 2 (class III PPK2) catalyzes both nucleoside monophosphate phosphorylation and nucleoside diphosphate phosphorylation. *Appl Environ Microbiol* 80:2602-8.
58. Zhang H, Ishige K, Kornberg A. 2002. A polyphosphate kinase (PPK2) widely conserved in bacteria. *Proc Natl Acad Sci U S A* 99:16678-83.
59. Delmas F, Pierre F, Coucheney F, Divies C, Guzzo J. 2001. Biochemical and physiological studies of the small heat shock protein Lo18 from the lactic acid bacterium *Oenococcus oeni*. *J Mol Microbiol Biotechnol* 3:601-10.
60. Coucheney F, Gal L, Beney L, Lherminier J, Gervais P, Guzzo J. 2005. A small HSP, Lo18, interacts with the cell membrane and modulates lipid physical state under heat shock conditions in a lactic acid bacterium. *Biochim Biophys Acta* 1720:92-8.

61. Weidmann S, Maitre M, Laurent J, Coucheney F, Rieu A, Guzzo J. 2017. Production of the small heat shock protein Lo18 from *Oenococcus oeni* in *Lactococcus lactis* improves its stress tolerance. *Int J Food Microbiol* 247:18-23.
62. Serrano LM, Molenaar D, Wels M, Teusink B, Bron PA, de Vos WM, Smid EJ. 2007. Thioredoxin reductase is a key factor in the oxidative stress response of *Lactobacillus plantarum* WCFS1. *Microb Cell Fact* 6:29.
63. Kono Y, Fridovich I. 1983. Isolation and characterization of the pseudocatalase of *Lactobacillus plantarum*. *J Biol Chem* 258:6015-9.
64. Deborde M, von Gunten U. 2008. Reactions of chlorine with inorganic and organic compounds during water treatment-Kinetics and mechanisms: a critical review. *Water Res* 42:13-51.
65. Gray MJ, Wholey WY, Parker BW, Kim M, Jakob U. 2013. NemR is a Bleach-Sensing Transcription Factor. *J Biol Chem* 288:13789-13798.
66. Serata M, Kiwaki M, Iino T. 2016. Functional analysis of a novel hydrogen peroxide resistance gene in *Lactobacillus casei* strain Shirota. *Microbiology* 162:1885-1894.
67. Deng DM, Liu MJ, ten Cate JM, Crielaard W. 2007. The VicRK system of *Streptococcus mutans* responds to oxidative stress. *J Dent Res* 86:606-10.
68. Hillion M, Antelmann H. 2015. Thiol-based redox switches in prokaryotes. *Biol Chem* 396:415-44.
69. Seaver LC, Imlay JA. 2001. Alkyl hydroperoxide reductase is the primary scavenger of endogenous hydrogen peroxide in *Escherichia coli*. *J Bacteriol* 183:7173-81.

70. Tachon S, Brandsma JB, Yvon M. 2010. NoxE NADH oxidase and the electron transport chain are responsible for the ability of *Lactococcus lactis* to decrease the redox potential of milk. *Appl Environ Microbiol* 76:1311-9.
71. Lenhart JS, Schroeder JW, Walsh BW, Simmons LA. 2012. DNA repair and genome maintenance in *Bacillus subtilis*. *Microbiol Mol Biol Rev* 76:530-64.
72. Kullin B, Tannock GW, Loach DM, Kimura K, Abratt VR, Reid SJ. 2014. A functional analysis of the formyl-coenzyme A (frc) gene from *Lactobacillus reuteri* 100-23C. *J Appl Microbiol* 116:1657-67.
73. Drazic A, Miura H, Peschek J, Le Y, Bach NC, Kriehuber T, Winter J. 2013. Methionine oxidation activates a transcription factor in response to oxidative stress. *Proc Natl Acad Sci U S A* 110:9493-9498.
74. Martinez-Antonio A, Collado-Vides J. 2003. Identifying global regulators in transcriptional regulatory networks in bacteria. *Curr Opin Microbiol* 6:482-9.
75. Russo P, de la Luz Mohedano M, Capozzi V, de Palencia PF, Lopez P, Spano G, Fiocco D. 2012. Comparative proteomic analysis of *Lactobacillus plantarum* WCFS1 and DeltactsR mutant strains under physiological and heat stress conditions. *Int J Mol Sci* 13:10680-96.
76. Elsholz AK, Gerth U, Hecker M. 2010. Regulation of CtsR activity in low GC, Gram+ bacteria. *Adv Microb Physiol* 57:119-44.
77. Gray MJ, Wholey WY, Wagner NO, Cremers CM, Mueller-Schickert A, Hock NT, Krieger AG, Smith EM, Bender RA, Bardwell JC, Jakob U. 2014. Polyphosphate is a primordial chaperone. *Mol Cell* 53:689-99.

78. Winter J, Ilbert M, Graf PC, Ozcelik D, Jakob U. 2008. Bleach activates a redox-regulated chaperone by oxidative protein unfolding. *Cell* 135:691-701.
79. Sineva E, Savkina M, Ades SE. 2017. Themes and variations in gene regulation by extracytoplasmic function (ECF) sigma factors. *Curr Opin Microbiol* 36:128-137.
80. Iobbi-Nivol C, Leimkuhler S. 2013. Molybdenum enzymes, their maturation and molybdenum cofactor biosynthesis in *Escherichia coli*. *Biochim Biophys Acta* 1827:1086-101.
81. Gottesman S. 2017. Stress Reduction, Bacterial Style. *J Bacteriol* 199.
82. Gray MJ, Jakob U. 2015. Oxidative stress protection by polyphosphate--new roles for an old player. *Curr Opin Microbiol* 24:1-6.
83. Rao NN, Gomez-Garcia MR, Kornberg A. 2009. Inorganic polyphosphate: essential for growth and survival. *Annu Rev Biochem* 78:605-47.
84. Bsai N, Herbig A, Casillas-Martinez L, Setlow P, Helmann JD. 1998. *Bacillus subtilis* contains multiple Fur homologues: identification of the iron uptake (Fur) and peroxide regulon (PerR) repressors. *Mol Microbiol* 29:189-98.
85. Alcantara C, Coll-Marques JM, Jadan-Piedra C, Velez D, Devesa V, Zuniga M, Monedero V. 2018. Polyphosphate in *Lactobacillus* and Its Link to Stress Tolerance and Probiotic Properties. *Front Microbiol* 9:1944.
86. Alcantara C, Blasco A, Zuniga M, Monedero V. 2014. Accumulation of polyphosphate in *Lactobacillus* spp. and its involvement in stress resistance. *Appl Environ Microbiol* 80:1650-9.

87. Sakatani A, Fujiya M, Ueno N, Kashima S, Sasajima J, Moriichi K, Ikuta K, Tanabe H, Kohgo Y. 2016. Polyphosphate Derived from *Lactobacillus brevis* Inhibits Colon Cancer Progression Through Induction of Cell Apoptosis. *Anticancer Res* 36:591-8.
88. Segawa S, Fujiya M, Konishi H, Ueno N, Kobayashi N, Shigyo T, Kohgo Y. 2011. Probiotic-derived polyphosphate enhances the epithelial barrier function and maintains intestinal homeostasis through integrin-p38 MAPK pathway. *PLoS One* 6:e23278.
89. Tanaka K, Fujiya M, Konishi H, Ueno N, Kashima S, Sasajima J, Moriichi K, Ikuta K, Tanabe H, Kohgo Y. 2015. Probiotic-derived polyphosphate improves the intestinal barrier function through the caveolin-dependent endocytic pathway. *Biochem Biophys Res Commun* 467:541-8.
90. Kashima S, Fujiya M, Konishi H, Ueno N, Inaba Y, Moriichi K, Tanabe H, Ikuta K, Ohtake T, Kohgo Y. 2015. Polyphosphate, an active molecule derived from probiotic *Lactobacillus brevis*, improves the fibrosis in murine colitis. *Transl Res* 166:163-75.
91. Wang L, Yan J, Wise MJ, Liu Q, Asenso J, Huang Y, Dai S, Liu Z, Du Y, Tang D. 2018. Distribution Patterns of Polyphosphate Metabolism Pathway and Its Relationships With Bacterial Durability and Virulence. *Front Microbiol* 9:782.
92. Achbergerova L, Nahalka J. 2014. PPK1 and PPK2 – which polyphosphate kinase is older? *Biologia* 69:263—269.
93. Dahl JU, Gray MJ, Bazopoulou D, Beaufay F, Lempart J, Koenigsknecht MJ, Wang Y, Baker JR, Hasler WL, Young VB, Sun D, Jakob U. 2017. The anti-

- inflammatory drug mesalamine targets bacterial polyphosphate accumulation.  
Nat Microbiol 2:16267.
94. van Pijkeren JP, Britton RA. 2012. High efficiency recombineering in lactic acid bacteria. Nucleic Acids Res 40:e76.
95. Edgar R, Domrachev M, Lash AE. 2002. Gene Expression Omnibus: NCBI gene expression and hybridization array data repository. Nucleic Acids Res 30:207-10.

**TABLE 1.** Strains and plasmids used in this study. Unless otherwise indicated, all strains were generated in the course of this work.

| Strain                            | Relevant Genotype                                                      | Source           |
|-----------------------------------|------------------------------------------------------------------------|------------------|
| <u><i>L. reuteri</i> strains:</u> |                                                                        |                  |
| ATCC PTA 6475                     | wild-type, human breast milk isolate                                   | Biogaia,<br>(94) |
| 6475 <i>rsiR</i> -Stop            | <i>rsiR</i> (LAR_RS05165) <sup>G6C, G7C, T10A, A11T, C12G, A13T</sup>  | (35)             |
| MJG0562                           | <i>ppk1</i> (LAR_RS01770) <sup>G94T, A95C, G96C, G97T, C98A</sup>      |                  |
| MJG0569                           | <i>ppk2</i> (LAR_RS00075) <sup>A52C, C53T, G54T, G55T, C56A</sup>      |                  |
| MJG0570                           | <i>rclA</i> (LAR_RS00915) <sup>C178A, A179G, T180C, G181T, G182A</sup> |                  |
| MJG0977                           | <i>msrB</i> (LAR_RS00975) <sup>G58T, T59C, T60C, A61T, C62A</sup>      |                  |
| MJG0979                           | <i>hsIO</i> (LAR_RS01385) <sup>G106A, A107T, T108G, A109T, C110A</sup> |                  |
| MJG1017                           | <i>lo18</i> (LAR_RS07000) <sup>T43A, T44C, G45T, A46T, T47A</sup>      |                  |
| MJG1056                           | LAR_RS09945 <sup>C103A, C104T, A105G, G106T, A107G</sup>               |                  |
| MJG1278                           | <i>sigH</i> (LAR_RS04695) <sup>G101A, G102A, C103T, C104A, G105A</sup> |                  |
| MJG1573                           | <i>perR</i> (LAR_RS06970) <sup>G10T, C11T, A12C, G13T, A14G</sup>      |                  |



# Plasmids:

pJP042

*recT<sup>+</sup> erm<sup>+</sup>*

(94)

## FIGURES

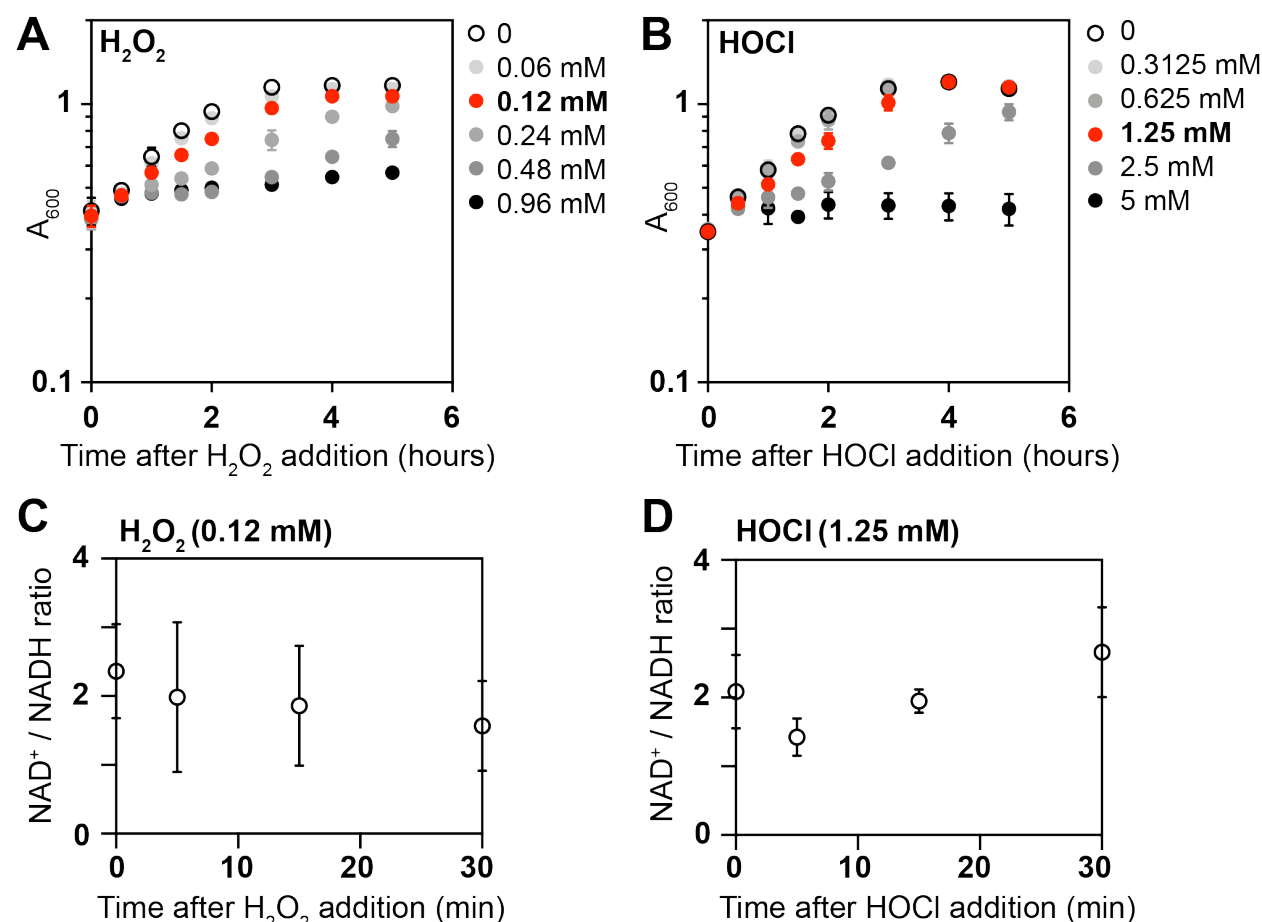

**FIG 1** Growth of *L. reuteri* is inhibited by inflammatory oxidants. *L. reuteri* ATCC PTA 6475 was grown anaerobically at 37°C to  $A_{600}$ =0.3–0.4 in MEI-C and then treated with the indicated concentrations of  $H_2O_2$  (A, C) or HOCl (B, D) (n=3,  $\pm$ SD).  $A_{600}$  (A, B) or  $NAD^+ / NADH$  ratios were measured at the indicated times. Red symbols indicate the stress treatments used for subsequent transcriptomic analyses.

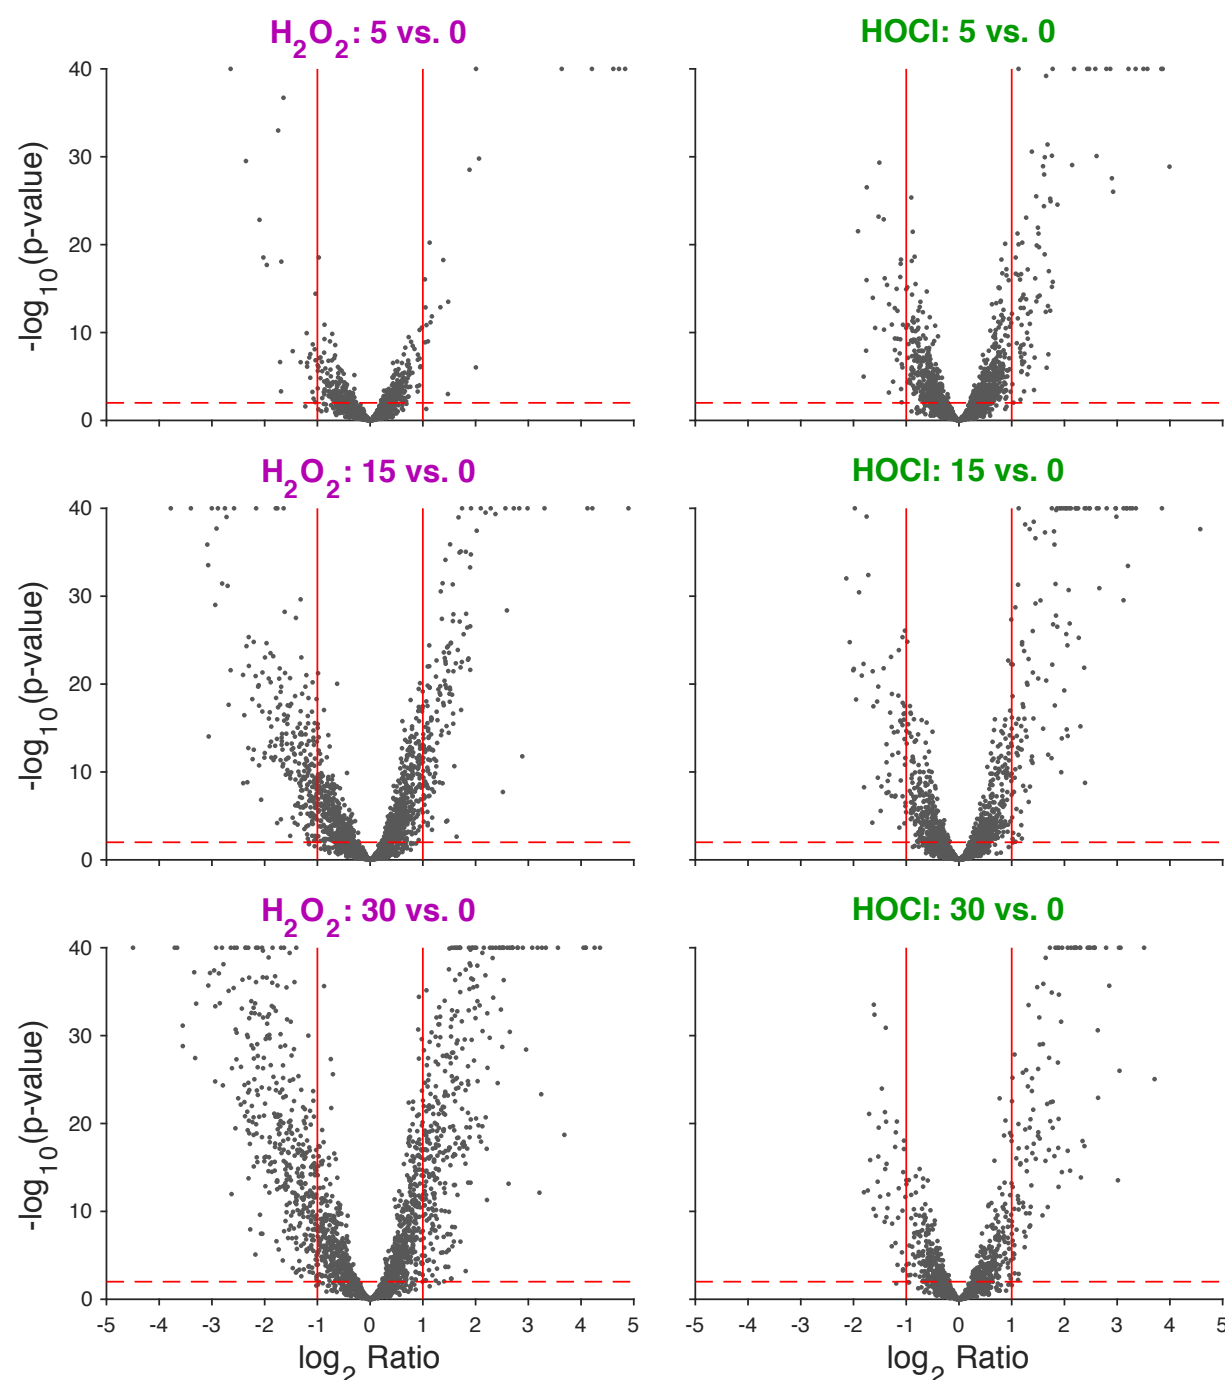

**FIG 2** Volcano plot of  $\log_2$ -fold changes in gene expression in anaerobically-grown *L. reuteri* ATCC PTA 6475 treated with 0.12 mM  $\text{H}_2\text{O}_2$  or 1.25 mM  $\text{HOCl}$  5, 15, and 30 minutes after stress treatment.  $-\log_{10}$  p-value is plotted against  $\log_2$  gene expression ratio for  $\text{H}_2\text{O}_2$ -treated (left column) and  $\text{HOCl}$ -treated (right column) cultures for three

time-points relative to their baseline (rows). Vertical red lines indicate +/- 2-fold changes. Horizontal red dashed line corresponds to  $p = 0.01$ .

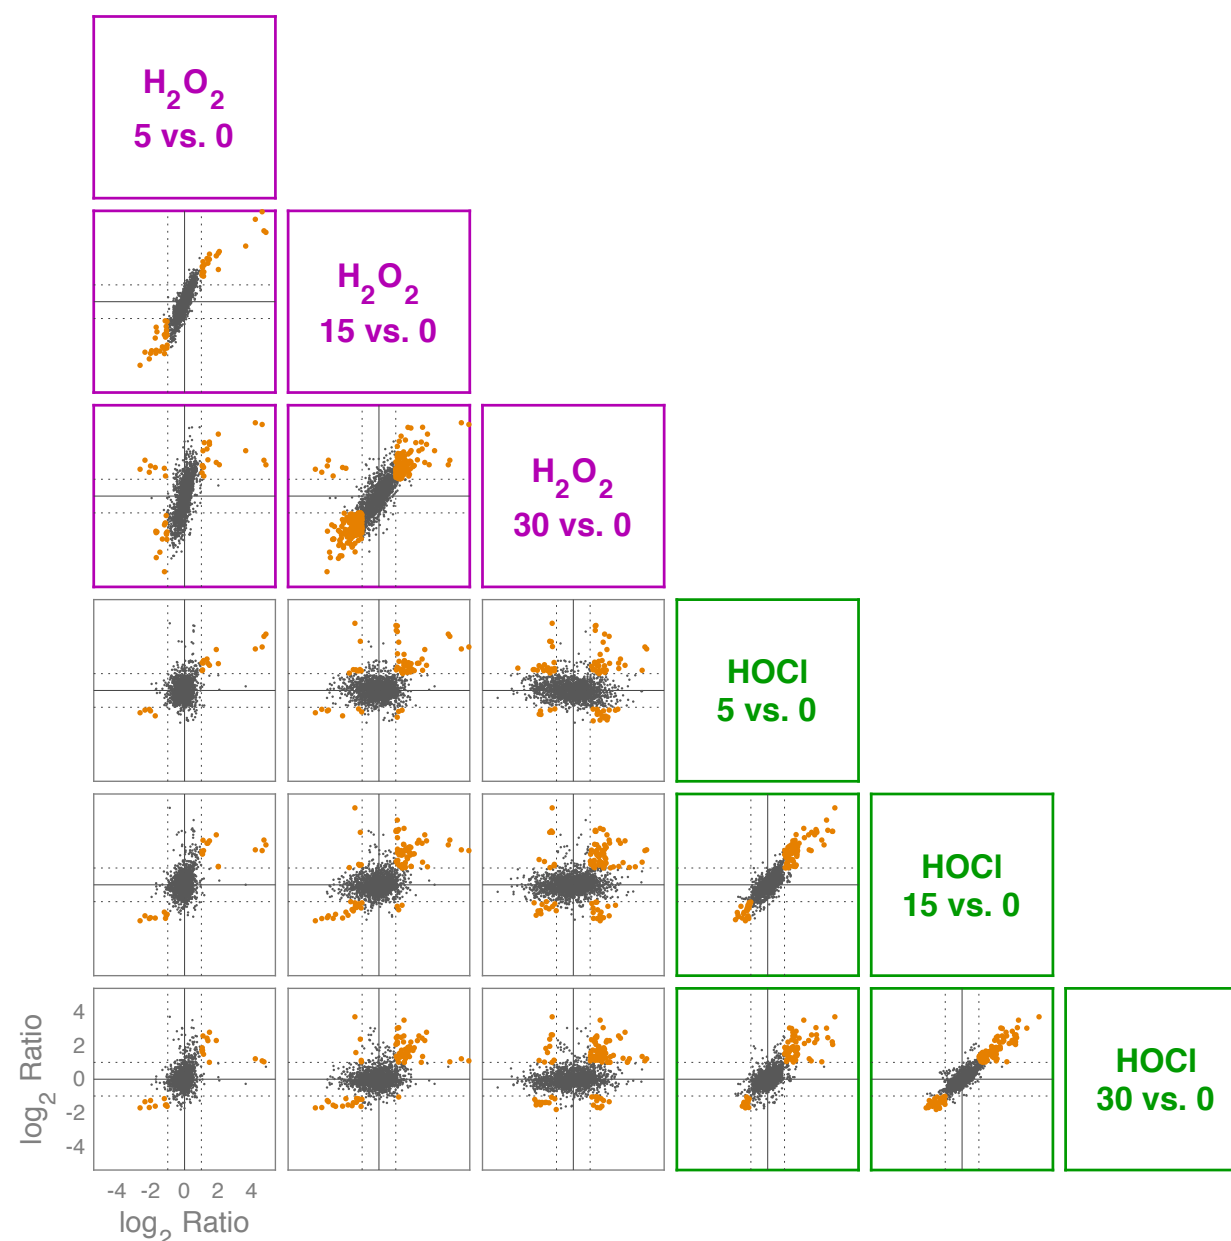

**FIG 3** Log<sub>2</sub>-fold changes in gene expression in anaerobically-grown *L. reuteri* ATCC PTA 6475 treated with 0.12 mM H<sub>2</sub>O<sub>2</sub> (purple) or 1.25 mM HOCl (green) 5, 15, and 30 minutes after stress treatment. 15 pairwise comparisons of log<sub>2</sub> ratios of six differential

728 expression experiments. Each dot represents a gene and its position reflects the  $\log_2$   
729 ratio in each of two differential expression results. Horizontal lines represent  $\pm$  2-fold  
730 changes. Orange points are genes with 2-fold changes in both differential expression  
731 data sets (not necessarily in the same directions). See Table S2 for individual genes in  
732 each expression category.  
733

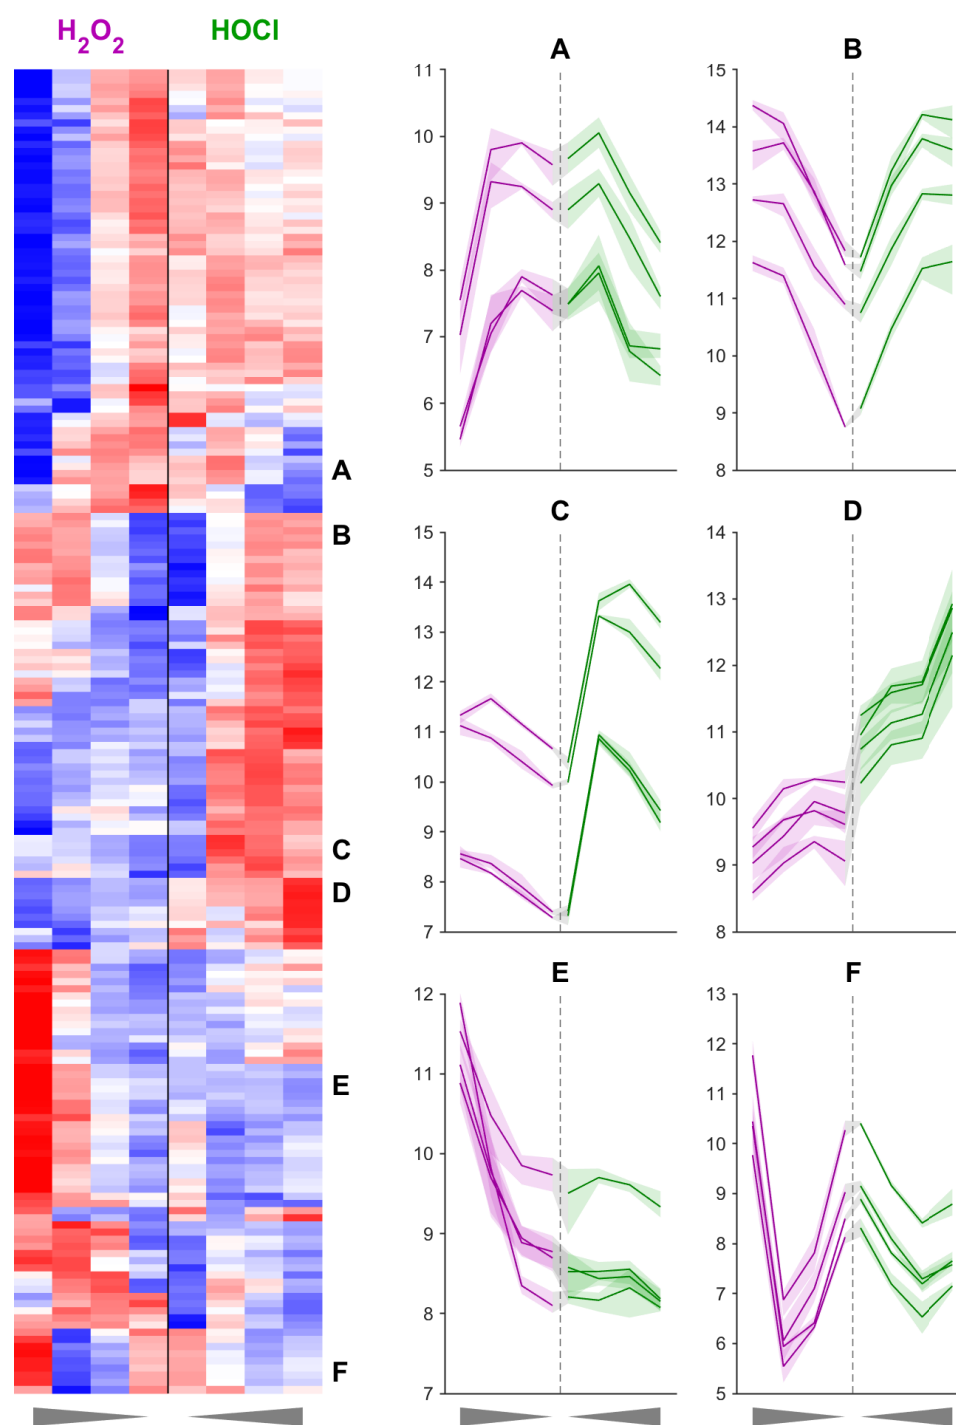

**FIG 4** Clustering analysis of gene expression levels (FPKM) in anaerobically-grown *L. reuteri* ATCC PTA 6475 treated with 0.12 mM H<sub>2</sub>O<sub>2</sub> (purple) or 1.25 mM HOCl (green) 0, 5, 15, and 30 minutes after stress treatment (times plotted outward from the center for each panel). Heat map showing row z-scores of rlog-transformed data (red = +2,

739 blue = -2). Rows are 185 high-variance genes (out of 2010; variance > 0.5, after  
740 averaging triplicates), columns are treatment/time-points (left four columns are H<sub>2</sub>O<sub>2</sub>,  
741 right four columns are HOCl; time emanates from center along x-axis as indicated by  
742 triangles below plot). Rows are hierarchically clustered using Euclidean distance of z-  
743 score data and average linkage. Letters A-F are callouts of six example sets of four  
744 genes each whose expression data are shown in the six plots on the right. Solid lines  
745 are mean expression values (triplicates) and shaded regions indicate maximum and  
746 minimum values of triplicates for the corresponding treatment/time-point. Called-out  
747 genes are A: LAR\_RS04660 (*ribD*), LAR\_RS04665 (*ribE*), LAR\_RS04670 (*ribBA*),  
748 LAR\_RS04675 (*ribH*); B: LAR\_RS03125, LAR\_RS02625 (*oxc*), LAR\_RS09770,  
749 LAR\_RS10190; C: LAR\_RS02280 (*copA2*), LAR\_RS02285 (*copA3*), LAR\_RS02290  
750 (*copA*), LAR\_RS09945; D: LAR\_RS01550 (*cgl*), LAR\_RS01555 (*cyuA*), LAR\_RS01560  
751 (*cyuB*), LAR\_RS01565 (*cyuC*); E: LAR\_RS08400, LAR\_RS07525, LAR\_RS07530,  
752 LAR\_RS07535 (*cwlA*); F: LAR\_RS05395 (*moaD*), LAR\_RS05400 (*moaE*),  
753 LAR\_RS05455, LAR\_RS05460.

754

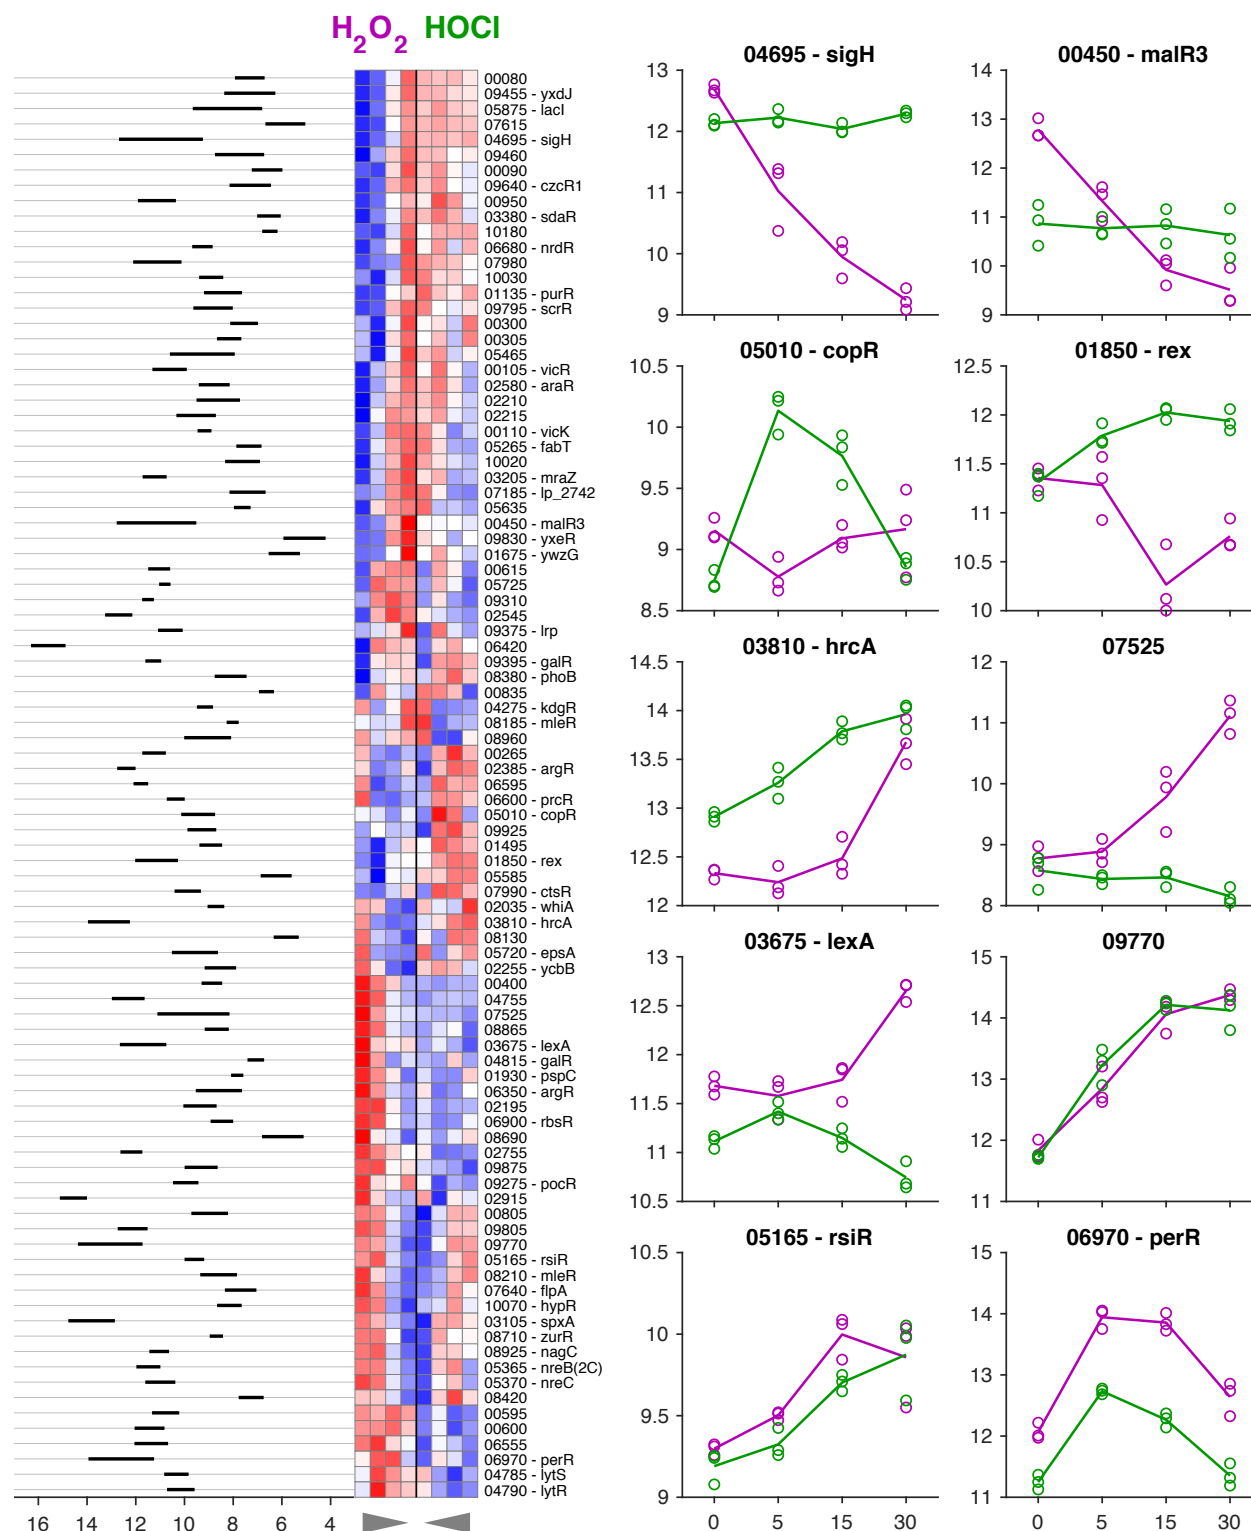

**FIG 5** Clustering analysis of gene expression for transcription factors in anaerobically-grown *L. reuteri* ATCC PTA 6475 treated with 0.12 mM  $H_2O_2$  (purple) or 1.25 mM  $HOCl$

(green) 0, 5, 15, and 30 minutes after stress treatment. Heat map showing z-scores of  
 rlog-transformed data (red = +2, blue = -2). Rows are 93 transcription factors where the  
 adjusted p-value was < 0.01 for any of the within-treatment baseline time comparisons,  
 columns are treatment/time-points (left four columns are H<sub>2</sub>O<sub>2</sub>, right four columns are  
 HOCl; time emanates from center along x-axis as indicated by triangles below plot).  
 Rows are hierarchically clustered using Euclidean distance of z-score data and average  
 linkage. rlog-transformed expression data are shown for ten example transcription  
 factors to the right of the heat map (lines are means, circles are individual replicates).  
 Expression range of averaged replicates shown to left of heat map. See Table S3 for  
 expression and log<sub>2</sub>-fold change values for all predicted transcription factors.



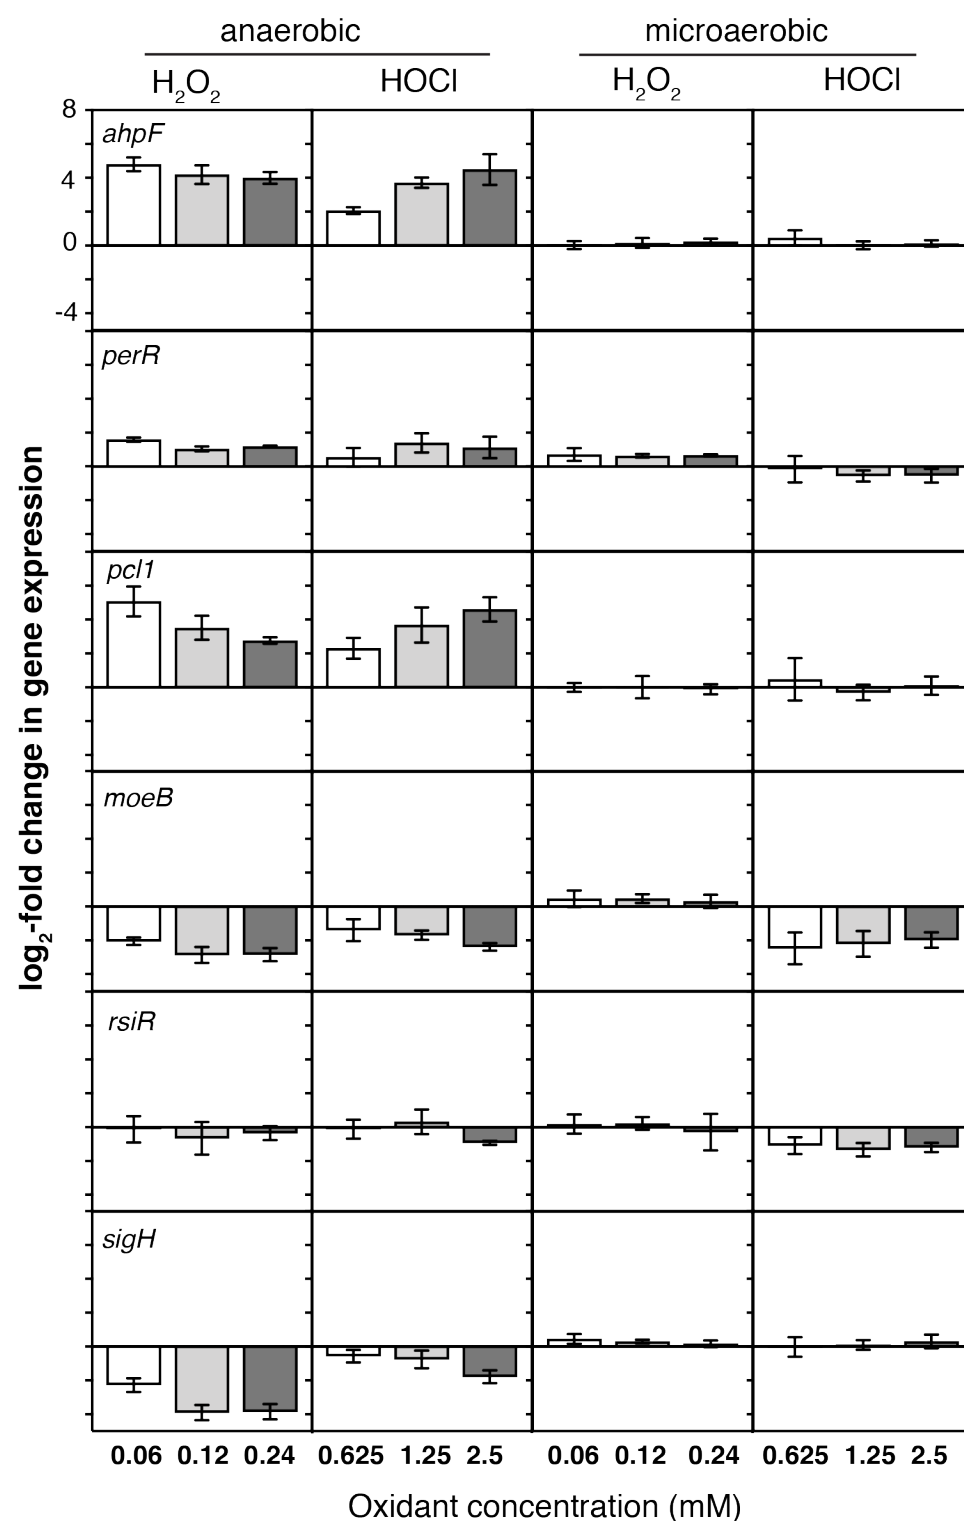

769

770 **FIG 6** Dose-responsive control of gene expression by oxidative stress. *L. reuteri* ATCC

771 PTA 6475 was grown anaerobically or microaerobically at 37°C to A<sub>600</sub>=0.3–0.4 in MEI-

772 C and then treated with the indicated concentrations of H<sub>2</sub>O<sub>2</sub> or HOCl. Change in  
773 expression of the indicated genes relative to untreated control cells was measured by  
774 quantitative RT-PCR (n=3, ±SD).

775

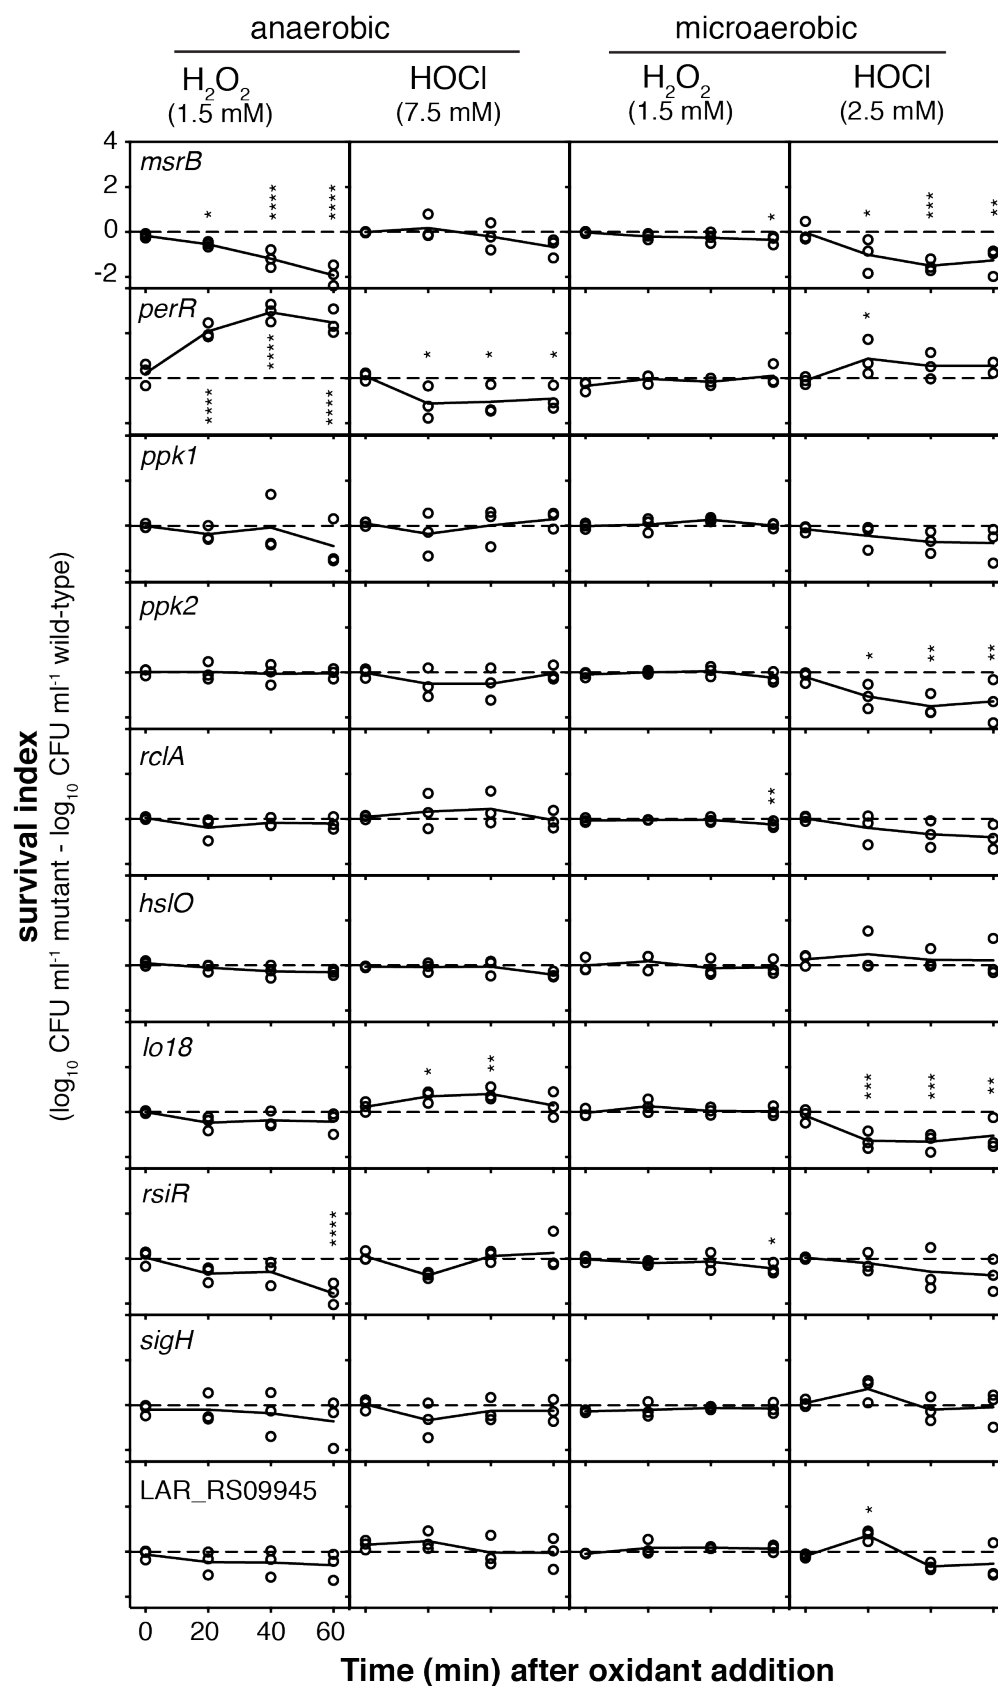

777 **FIG 7** Genes regulated by inflammatory oxidants affect survival of lethal oxidative stress  
 778 in *L. reuteri*. Survival index ( $\log_{10}$  CFU ml<sup>-1</sup> of mutant strain minus the  $\log_{10}$  CFU ml<sup>-1</sup> of  
 779 wild-type strain from the same experimental replicate) of anaerobically or  
 780 microaerobically-grown *msrB*, *perR*, *ppk1*, *ppk2*, *rclA*, *hslO*, *lo18*, *rsiR*, *sigH*, and  
 781 LAR\_RS09945 null mutants at the indicated time points after addition of 1.5 mM H<sub>2</sub>O<sub>2</sub> or  
 782 7.5 or 2.5 mM HOCl. Asterisks indicate survival indices significantly different from zero  
 783 at the indicated time point (two-way repeated measures ANOVA with Holm-Sidak's  
 784 multiple comparisons test, \* =  $p < 0.05$ , \*\* =  $p < 0.01$ , \*\*\* =  $p < 0.001$ , \*\*\*\* =  $p < 0.0001$ ).
